# Supplementary material for: Machine Learning Assisted Discovery of Interactions between Pesticides, Phthalates, Phenols, and Trace Elements in Child Neurodevelopment
Source: PubMed Central journal article supplement — Environ Sci Technol. 2023 Aug 18;57(46):18139–50. doi: 10.1021/acs.est.3c00848 (PMC10666542; doi:10.1021/acs.est.3c00848), 2023-08-18
Supplement: es3c00848_si_001.pdf [file es3c00848_si_001.pdf]

# Supporting Information

## Machine learning assisted discovery of interactions between pesticides, phthalates, phenols, and trace elements in child neurodevelopment

Vishal Midya<sup>1a\*</sup>, Cecilia Sara Alcala<sup>1a</sup>, Elza Rechtman<sup>1</sup>, Jill K Gregory<sup>2</sup>, Kurunthachalam Kannan<sup>3</sup>, Irva Hertz-Picciotto<sup>4,5</sup>, Susan L. Teitelbaum<sup>1</sup>, Chris Gennings<sup>1</sup>, Maria Rosa<sup>1b</sup>, and Damaskini Valvi<sup>1b</sup>

<sup>1</sup>Department of Environmental Medicine and Public Health, Icahn School of Medicine at Mount Sinai, New York, NY 10029, USA

<sup>2</sup>Instructional Technology Group, Icahn School of Medicine at Mount Sinai, New York, NY 10029, USA

<sup>3</sup>Department of Pediatrics and Department of Environmental Medicine, New York University School of Medicine, New York, NY 10016, USA

<sup>4</sup>Department of Public Health Sciences, School of Medicine, University of California at Davis (UC Davis), Davis, CA 95817, USA

<sup>5</sup>UC Davis MIND (Medical Investigations of Neurodevelopmental Disorders) Institute, UC Davis, Sacramento, CA 95817, USA

\*Email: vishal.midya@mssm.edu

<sup>a</sup> VM and CSA contributed equally to this paper

<sup>b</sup> MR and DV contributed equally to this paper

**Number of Pages: 29**

**Number of Figures: 2**

**Number of Tables: 13**

This Supporting Information includes the following:

- 1) **Figure S1:** Results from nested linear models with WQS and discovered interaction indicators (cutoff set at 67th percentile) and WQS chemical mixture
- 2) **Figure S2:** Plot for pair-wise interactions at quantiles 25th, 50th, and 75th between Diethyl-phosphate (DEP), Cadmium (Cd), and 2,4,6-Trichlorophenol (TCP-246) obtained from Bayesian Kernel Machine Regression (BKMR) model
- 3) **Table S1:** Chemical names and abbreviations
- 4) **Table S2:** Limit of detection (LOD) for individual chemicals and percent detection above the LOD by chemical classes
- 5) **Table S3:** Distribution of log-transformed (base =2) specific gravity-adjusted urinary phenol, phthalate, and trace element biomarker concentrations (ng/ml) among 479 participants included in the analysis
- 6) **Table S4:** Distribution of log-transformed (base =2) and specific gravity-adjusted urinary phenol, phthalate, and trace element biomarker concentrations (ng/ml) among 231 ASD participants included in the analysis
- 7) **Table S5:** Distribution of log-transformed (base =2) and specific gravity-adjusted urinary phenol, phthalate, and trace element biomarker concentrations (ng/ml) among 248 TD participants included in the analysis
- 8) **Table S6:** Distribution of log-transformed (base =2) and specific gravity-unadjusted urinary phenol, phthalate, and trace element biomarker concentrations (ng/ml) among 479 participants included in the analysis
- 9) **Table S7:** Distribution of log-transformed (base =2) and specific gravity-unadjusted urinary phenol, phthalate, and trace element biomarker concentrations (ng/ml) among 231 ASD participants included in the analysis
- 10) **Table S8:** Distribution of log-transformed (base =2) and specific gravity-unadjusted urinary phenol, phthalate, and trace element biomarker concentrations (ng/ml) among 248 TD participants included in the analysis

- 11) **Table S9:** Univariate associations between ASD diagnosis and log-transformed (base =2), specific gravity-adjusted urinary phenol, phthalate, and trace element biomarker concentrations
  
- 12) **Table S10:** Univariate associations between ASD diagnosis and log-transformed (base =2), specific gravity-unadjusted urinary phenol, phthalate, and trace element biomarker concentrations
  
- 13) **Table S11:** Results of SiRF from the three different data partitions
  
- 14) **Table S12:** Results of SiRF from the three different data partitions without chemicals whose % of detection above LOD was less than 60%
  
- 15) **Table S13:** Results of SiRF when the whole dataset was used to test the model trained on 75% data
  
- 16) Tuning Parameters for the main WQS-SiRF analysis

Figure S1

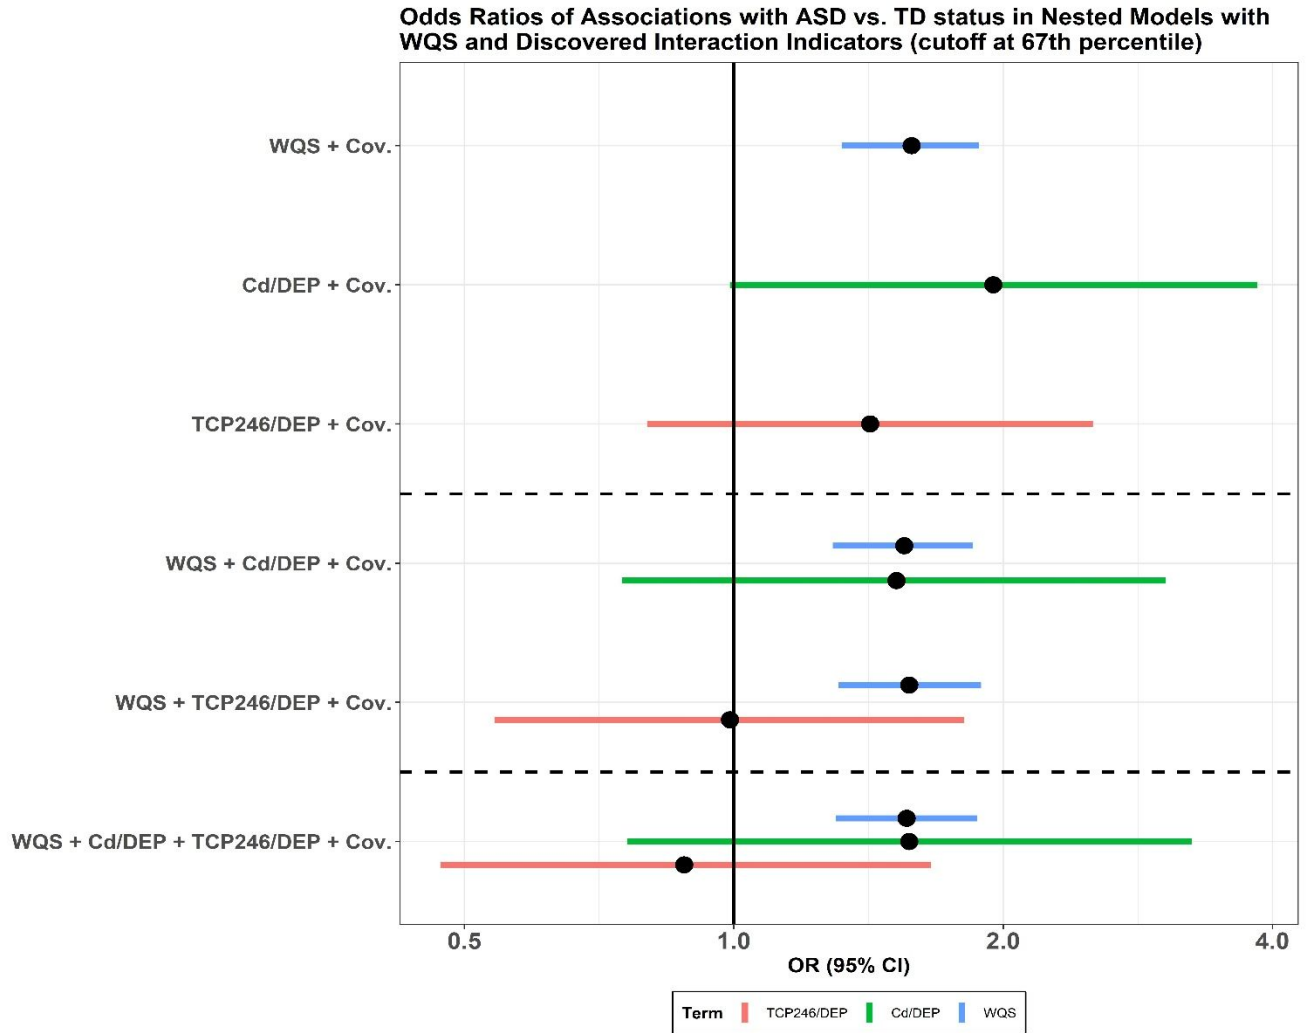

**Figure S1:** Results from nested linear models with WQS and discovered interaction indicators (cutoff set at 67<sup>th</sup> percentile) and WQS chemical mixture. In the top three models, the WQS chemical mixture and the two interaction indicators were used in separate models. Both interaction indicators were adjusted for the WQS chemical mixture in the following two models. In the last model, interaction indicators and the WQS chemical mixture were put in the same model. All models were adjusted for covariates.

**Figure S2:**

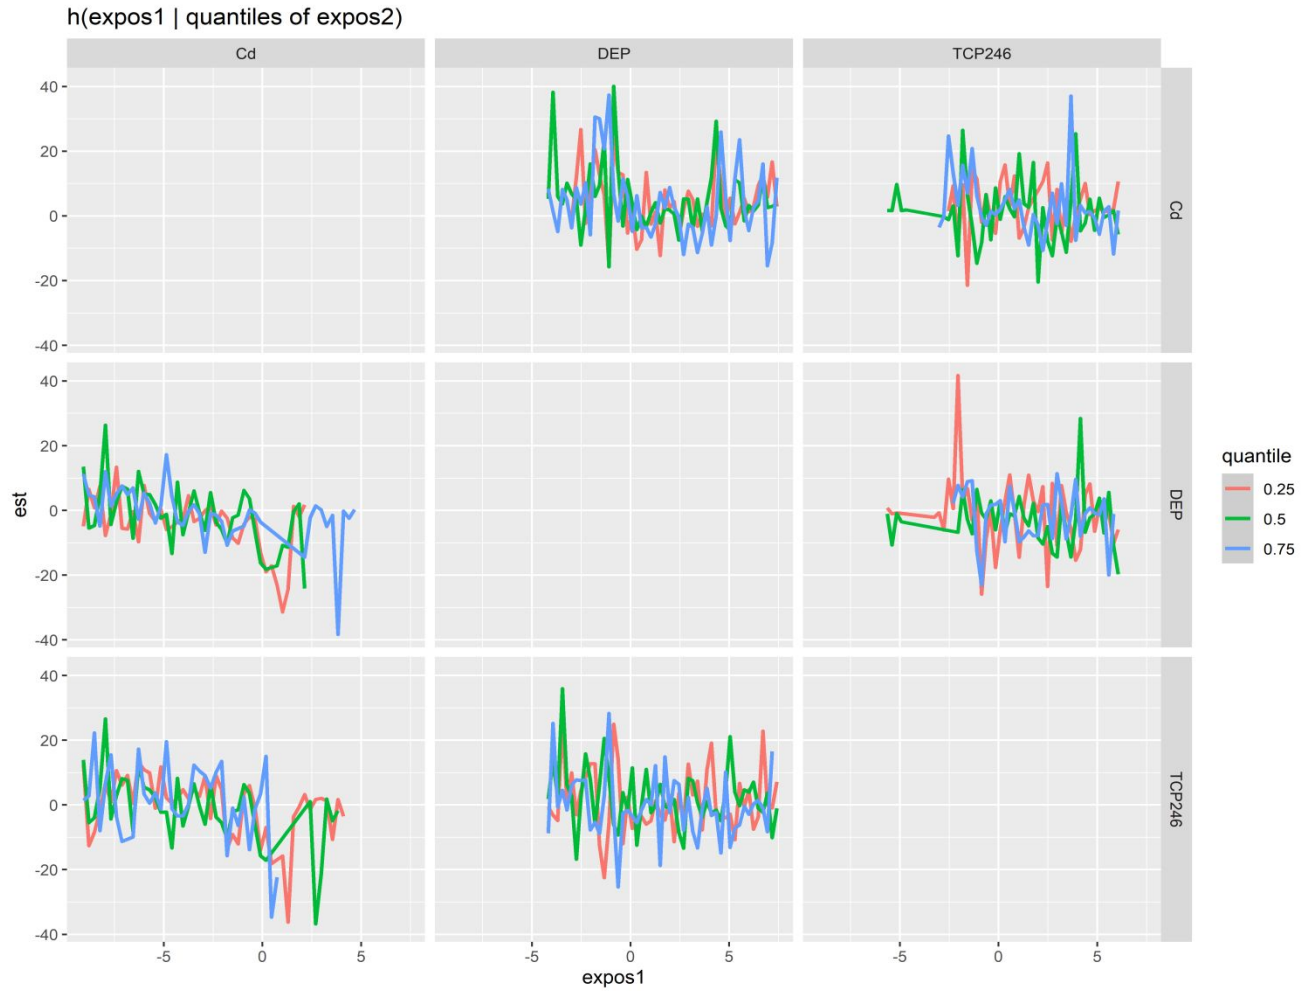

**Figure S2:** Plot for pair-wise interactions at quantiles 25<sup>th</sup>, 50<sup>th</sup>, and 75<sup>th</sup> between Diethyl-phosphate (DEP), Cadmium (Cd), and 2,4,6-Trichlorophenol (TCP-246) obtained from Bayesian Kernel Machine Regression (BKMR) model (adjusted for covariates)

**Table S1: Chemical names and abbreviations\***

| Chemical class              | Chemical Abbreviation | Chemical Full Name                            |
|-----------------------------|-----------------------|-----------------------------------------------|
| <b>Phenols and Parabens</b> | BP1                   | Benzophenone-1                                |
|                             | BP2                   | 2,2',4,4'-tetrahydroxybenzophenone            |
|                             | BP3                   | Benzophenone-3                                |
|                             | BP8                   | 2,2'-dihydroxy-methoxybenzophenone            |
|                             | BPA                   | Bisphenol A                                   |
|                             | BPAF                  | 4,4'-(hexafluoroisopropylidene)-dephenol      |
|                             | BPAP                  | 4,4'-(1-phenylethylidene)bisphenol            |
|                             | BPB                   | 2,2'-bis(4-hydroxyphenyl)butane               |
|                             | BPF                   | Bisphenol F                                   |
|                             | BPP                   | 4,4'-(1,4-Phenylenediisopropylidene)bisphenol |
|                             | BPS                   | Bisphenol S                                   |
|                             | BPZ                   | 4,4'-cyclo-hexylidenebisphenol                |
|                             | BUPB                  | Butyl paraben                                 |
|                             | BZPB                  | Benzyl paraben                                |
|                             | DCP24                 | 2,4-Dichlorophenol                            |
|                             | DCP25                 | 2,5-Dichlorophenol                            |
|                             | DHB34                 | 3,4-Dihydroxy benzoic acid                    |
|                             | ETPB                  | Ethyl paraben                                 |
|                             | HB4                   | 4-Hydroxybenzoic acid                         |
|                             | HEPB                  | Heptyl paraben                                |
|                             | MEPB                  | Methyl Paraben                                |
|                             | OH4BP                 | 4-hydroxybenzophenone                         |
|                             | OHETP                 | Protocatechuic acid ethyl ester               |
|                             | OHMEP                 | 3,4-Dihydroxy-benzoic acid methyl ester       |
|                             | PCP                   | Pentachlorophenol                             |
|                             | PRPB                  | Propyl paraben                                |
|                             | TCC                   | Triclocarban                                  |
|                             | TCP245                | 2,4,5-Trichlorophenol                         |
|                             | TCP246                | 2,4,6-Trichlorophenol                         |
|                             | TCS                   | Triclosan                                     |
| <b>Phthalates</b>           | MBZP                  | mono-benzyl phthalate                         |
|                             | MCHP                  | Monocyclohexyl phthalate                      |
|                             | MCHPP                 | mono(7-carboxyheptyl)phthalate                |
|                             | MCINP                 | mono-carboxy isononyl phthalate               |
|                             | MCIOP                 | mono-carboxy isooctyl phthalate               |
|                             | MCMHP                 | Mono-2-(carboxymethyl) hexyl phthalate        |
|                             | MCPP                  | mono (3-carboxypropyl) phthalate (multiple)   |
|                             | MECPP                 | mono-(2-ethyl-5-carboxypentyl) phthalate      |
|                             | MEHHP                 | mono (2-ethyl-5-hydroxyhexyl) phthalate       |
|                             | MEOHP                 | mono (2-ethyl-5-oxohexyl) phthalate           |
|                             | MEP                   | monoethyl phthalate (DEP)                     |
|                             | MHPP                  | mono-2-heptyl phthalate                       |
|                             | MHXP                  | mono-hexyl phthalate                          |
|                             | MIBP                  | mono-isobutyl phthalate (DiBP)                |
|                             | MINP                  | mono-isononyl phthalate                       |
|                             | MIPP                  | Mono-isopropyl phthalate                      |
|                             | MMP                   | mono-methyl phthalate                         |
|                             | MNBP                  | mono-n-butylphthalate (BzBP, DnBP)            |
|                             | MOP                   | Mono-n-octyl phthalate                        |
|                             | MPEP                  | mono-pentyl phthalate                         |

|                       |      |                         |
|-----------------------|------|-------------------------|
| <b>Pesticides</b>     | DMP  | Dimethylphosphate       |
|                       | DEP  | Diethylphosphate        |
|                       | DMTP | Dimethylthiophosphate   |
|                       | DETP | Diethylthiophosphate    |
|                       | DMDP | Dimethyldithiophosphate |
|                       | DEDP | Diethyldithiophosphate  |
| <b>Trace Elements</b> | As   | Arsenic                 |
|                       | Be   | Beryllium               |
|                       | Cd   | Cadmium                 |
|                       | Mo   | Molybdenum              |
|                       | Tl   | Thallium                |
|                       | U    | Uranium                 |

\* From (Bennett et al. 2022)

**Table S2: Limit of detection (LOD) for individual chemicals and percent detection above the LOD by chemical classes**

| Phenols (N=479) |      |             | Phthalates (N=479) |             |             | Pesticides (N=479) |             |             | Trace Elements (N=479) |             |             |
|-----------------|------|-------------|--------------------|-------------|-------------|--------------------|-------------|-------------|------------------------|-------------|-------------|
| Chemical        | LOD  | % above LOD | Chemical           | LOD (ng/ml) | % above LOD | Chemical           | LOD (ng/ml) | % above LOD | Chemical               | LOD (ng/ml) | % above LOD |
| BP1             | 0.05 | 100         | MBZP               | 0.02        | 99.25       | DMP                | 0.05        | 99.55       | As                     | 0.059       | 100         |
| BP2             | 0.2  | 11.19       | MCHP               | 0.50        | 07.46       | DEP                | 0.10        | 99.25       | Be                     | 0.022       | 6.57        |
| BP3             | 0.5  | 100         | MCHPP              | 0.10        | 26.57       | DMTP               | 0.05        | 95.82       | Mo                     | 0.45        | 100         |
| BP8             | 0.02 | 80.90       | MCINP              | 0.01        | 98.66       | DETP               | 0.02        | 98.51       | Cd                     | 0.006       | 72.84       |
| BPA             | 0.05 | 98.66       | MCIOP              | 0.01        | 99.85       | DMDP               | 0.02        | 91.79       | Tl                     | 0.005       | 100         |
| BPAF            | 0.05 | 0.75        | MCMHP              | 0.02        | 98.81       | DEDP               | 0.05        | 3.73        | U                      | 0.0007      | 99.55       |
| BPAP            | 0.1  | 89.25       | M CPP              | 0.05        | 99.85       |                    |             |             |                        |             |             |
| BPB             | 0.05 | 50.75       | MECPP              | 0.02        | 99.70       |                    |             |             |                        |             |             |
| BPF             | 0.5  | 89.40       | MEHHP              | 0.20        | 100         |                    |             |             |                        |             |             |
| BPP             | 0.01 | 76.72       | MEOHP              | 0.01        | 100         |                    |             |             |                        |             |             |
| BPS             | 0.05 | 94.78       | MEP                | 0.10        | 100         |                    |             |             |                        |             |             |
| BPZ             | 0.05 | 1.19        | MHPP               | 0.50        | 74.18       |                    |             |             |                        |             |             |
| BUPB            | 0.05 | 92.84       | MHXP               | 0.50        | 57.16       |                    |             |             |                        |             |             |
| BZPB            | 0.1  | 14.48       | MIBP               | 0.01        | 100         |                    |             |             |                        |             |             |
| DCP24           | 0.02 | 95.07       | MINP               | 0.01        | 0           |                    |             |             |                        |             |             |
| DCP25           | 0.02 | 88.06       | MIPP               | 0.50        | 2.69        |                    |             |             |                        |             |             |
| DHB34           | 0.2  | 100         | MMP                | 5.0         | 41.34       |                    |             |             |                        |             |             |
| ETPB            | 0.02 | 99.1        | MNBP               | 0.20        | 99.85       |                    |             |             |                        |             |             |
| HB4             | 1    | 100         | MOP                | 0.50        | 1.64        |                    |             |             |                        |             |             |
| HEPB            | 0.1  | 0.30        | MPEP               | 1.0         | 2.69        |                    |             |             |                        |             |             |
| MEPB            | 0.05 | 99.85       |                    |             |             |                    |             |             |                        |             |             |
| OH4BP           | 0.2  | 98.81       |                    |             |             |                    |             |             |                        |             |             |
| OHETP           | 0.1  | 65.67       |                    |             |             |                    |             |             |                        |             |             |
| OHMEP           | 0.1  | 96.12       |                    |             |             |                    |             |             |                        |             |             |
| PCP             | 0.05 | 96.27       |                    |             |             |                    |             |             |                        |             |             |
| PRPB            | 0.1  | 98.51       |                    |             |             |                    |             |             |                        |             |             |
| TCC             | 0.1  | 07.91       |                    |             |             |                    |             |             |                        |             |             |
| TCP245          | 0.1  | 51.75       |                    |             |             |                    |             |             |                        |             |             |
| TCP246          | 0.02 | 99.85       |                    |             |             |                    |             |             |                        |             |             |
| TCS             | 0.1  | 96.87       |                    |             |             |                    |             |             |                        |             |             |



**Table S3: Distribution of log-transformed (base=2) specific gravity-adjusted urinary phenol, phthalate, and trace element biomarker concentrations (ng/ml) among 479 participants included in the analysis**

| <b>Chemical</b> | <b>5<sup>th</sup> Percentile</b> | <b>25<sup>th</sup> Percentile</b> | <b>Median</b> | <b>75<sup>th</sup> Percentile</b> | <b>95<sup>th</sup> Percentile</b> |
|-----------------|----------------------------------|-----------------------------------|---------------|-----------------------------------|-----------------------------------|
| <i>Phenols</i>  |                                  |                                   |               |                                   |                                   |
| BP1             | 0.76                             | 2.58                              | 4.00          | 5.91                              | 12.75                             |
| BP2             | -3.84                            | -3.53                             | -3.16         | -2.54                             | -0.96                             |
| BP3             | 2.75                             | 4.32                              | 5.82          | 7.64                              | 10.51                             |
| BP8             | -6.75                            | -3.51                             | -1.87         | -0.10                             | 3.45                              |
| BPA             | -1.53                            | 0.15                              | 1.16          | 1.98                              | 3.52                              |
| BPAF            | -5.87                            | -5.60                             | -5.30         | -4.82                             | -4.32                             |
| BPAP            | -4.09                            | -2.58                             | -1.64         | -0.88                             | 0.40                              |
| BPB             | -5.70                            | -5.16                             | -4.32         | -3.24                             | -1.94                             |
| BPF             | -2.22                            | 0.41                              | 1.65          | 3.07                              | 4.44                              |
| BPP             | -7.92                            | -6.39                             | -3.50         | -2.14                             | -0.38                             |
| BPS             | -4.32                            | -2.56                             | -1.30         | -0.09                             | 2.03                              |
| BPZ             | -5.87                            | -5.60                             | -5.30         | -4.82                             | -4.32                             |
| BUPB            | -4.46                            | -2.51                             | -1.34         | 0.03                              | 3.75                              |
| BZPB            | -4.84                            | -4.54                             | -4.13         | -3.43                             | -1.90                             |
| DCP24           | -4.38                            | 0.32                              | 1.40          | 2.48                              | 3.68                              |
| DCP25           | -6.66                            | 0.61                              | 1.83          | 2.73                              | 5.88                              |
| DHB34           | 5.17                             | 6.48                              | 7.39          | 8.10                              | 9.12                              |
| ETPB            | -2.13                            | -0.84                             | 0.32          | 1.68                              | 5.62                              |
| HB4             | 9.20                             | 10.06                             | 10.55         | 11.24                             | 12.75                             |
| HEPB            | -4.87                            | -4.60                             | -4.30         | -3.84                             | -3.32                             |
| MEPB            | 2.14                             | 3.63                              | 5.41          | 7.55                              | 11.29                             |
| OH4BP           | -1.11                            | 0.35                              | 0.97          | 1.67                              | 3.71                              |
| OHETP           | -4.62                            | -3.57                             | -1.51         | -0.02                             | 1.97                              |
| OHMEP           | -2.28                            | 0.63                              | 2.16          | 3.71                              | 6.61                              |
| PCP             | -2.53                            | -0.75                             | 0.05          | 0.91                              | 2.14                              |
| PRPB            | -1.16                            | 0.95                              | 2.60          | 4.73                              | 8.52                              |
| TCC             | -4.85                            | -4.58                             | -4.20         | -3.65                             | -1.51                             |
| TCP245          | -4.70                            | -4.16                             | -3.32         | -2.38                             | -0.89                             |
| TCP246          | -1.07                            | -0.01                             | 0.56          | 1.28                              | 2.61                              |
| TCS             | -1.34                            | 1.49                              | 2.98          | 4.72                              | 7.42                              |

| <b>Chemical</b>   | <b>5<sup>th</sup> Percentile</b> | <b>25<sup>th</sup> Percentile</b> | <b>Median</b> | <b>75<sup>th</sup> Percentile</b> | <b>95<sup>th</sup> Percentile</b> |
|-------------------|----------------------------------|-----------------------------------|---------------|-----------------------------------|-----------------------------------|
| <i>Phthalates</i> |                                  |                                   |               |                                   |                                   |
| MBZP              | 2.15                             | 3.88                              | 4.97          | 6.13                              | 8.04                              |
| MCHP              | -2.52                            | -2.25                             | -1.88         | -1.33                             | -0.34                             |
| MCHPP             | -4.84                            | -4.49                             | -3.93         | -3.29                             | 3.90                              |
| MCINP             | 0.47                             | 1.81                              | 2.54          | 3.30                              | 4.84                              |
| MCIOP             | 2.07                             | 3.59                              | 4.37          | 5.20                              | 6.81                              |
| MCMHP             | 1.20                             | 3.13                              | 4.08          | 5.08                              | 6.51                              |
| MCPP              | 0.40                             | 1.66                              | 2.45          | 3.27                              | 4.50                              |
| MECPP             | 2.97                             | 4.27                              | 5.04          | 6.06                              | 7.59                              |
| MEHHP             | 3.32                             | 4.64                              | 5.48          | 6.50                              | 8.34                              |

|              |       |       |       |       |       |
|--------------|-------|-------|-------|-------|-------|
| <b>MEOHP</b> | 1.98  | 3.30  | 4.24  | 5.33  | 7.03  |
| <b>MEP</b>   | 3.64  | 4.62  | 5.41  | 6.31  | 8.34  |
| <b>MHPP</b>  | -2.11 | -1.00 | 0.43  | 1.69  | 3.72  |
| <b>MHXP</b>  | -2.38 | -1.73 | -0.56 | 3.56  | 7.12  |
| <b>MIBP</b>  | 2.32  | 3.47  | 4.31  | 5.14  | 6.59  |
| <b>MINP</b>  | -8.19 | -7.92 | -7.62 | -7.16 | -6.64 |
| <b>MIPP</b>  | -2.52 | -2.28 | -1.95 | -1.43 | -1.00 |
| <b>MMP</b>   | 0.89  | 1.34  | 2.10  | 2.98  | 4.84  |
| <b>MNBP</b>  | 3.53  | 4.65  | 5.45  | 6.19  | 7.39  |
| <b>MOP</b>   | -2.55 | -2.28 | -1.95 | -1.48 | -1.00 |
| <b>MPEP</b>  | -1.52 | -1.28 | -0.95 | -0.48 | 0.00  |

| <b>Chemical</b>          | <b>5<sup>th</sup> Percentile</b> | <b>25<sup>th</sup> Percentile</b> | <b>Median</b> | <b>75<sup>th</sup> Percentile</b> | <b>95<sup>th</sup> Percentile</b> |
|--------------------------|----------------------------------|-----------------------------------|---------------|-----------------------------------|-----------------------------------|
| <i><b>Pesticides</b></i> |                                  |                                   |               |                                   |                                   |
| <b>DMP</b>               | 0.22                             | 1.82                              | 3.16          | 4.34                              | 6.06                              |
| <b>DEP</b>               | -0.63                            | 0.88                              | 2.02          | 3.18                              | 4.78                              |
| <b>DMTP</b>              | -3.39                            | 0.19                              | 1.81          | 3.68                              | 5.62                              |
| <b>DETP</b>              | -4.10                            | -2.25                             | -1.03         | 0.32                              | 2.52                              |
| <b>DMDP</b>              | -6.12                            | -3.23                             | -1.69         | 0.01                              | 2.99                              |
| <b>DEDP</b>              | -5.85                            | -5.57                             | -5.24         | -4.75                             | -4.32                             |

| <b>Chemical</b>              | <b>5<sup>th</sup> Percentile</b> | <b>25<sup>th</sup> Percentile</b> | <b>Median</b> | <b>75<sup>th</sup> Percentile</b> | <b>95<sup>th</sup> Percentile</b> |
|------------------------------|----------------------------------|-----------------------------------|---------------|-----------------------------------|-----------------------------------|
| <i><b>Trace Elements</b></i> |                                  |                                   |               |                                   |                                   |
| <b>As</b>                    | 1.99                             | 2.83                              | 3.47          | 4.11                              | 5.57                              |
| <b>Be</b>                    | -7.03                            | -6.77                             | -6.42         | -5.86                             | -5.51                             |
| <b>Mo</b>                    | 5.02                             | 6.04                              | 6.62          | 7.18                              | 8.25                              |
| <b>Cd</b>                    | -8.81                            | -7.43                             | -5.46         | -4.37                             | -3.03                             |
| <b>Tl</b>                    | -3.53                            | -2.71                             | -2.25         | -1.78                             | -0.98                             |
| <b>U</b>                     | -8.48                            | -7.35                             | -6.62         | -5.68                             | -4.26                             |

**Table S4: Distribution of log-transformed (base =2) and specific gravity-adjusted urinary phenol, phthalate, and trace element biomarker concentrations (ng/ml) among 231 ASD participants included in the analysis**

| <b>Chemical</b> | <b>5<sup>th</sup> Percentile</b> | <b>25<sup>th</sup> Percentile</b> | <b>Median</b> | <b>75<sup>th</sup> Percentile</b> | <b>95<sup>th</sup> Percentile</b> |
|-----------------|----------------------------------|-----------------------------------|---------------|-----------------------------------|-----------------------------------|
| <i>Phenols</i>  |                                  |                                   |               |                                   |                                   |
| BP1             | 0.75                             | 2.43                              | 3.56          | 5.60                              | 12.61                             |
| BP2             | -3.87                            | -3.53                             | -3.16         | -2.37                             | -0.96                             |
| BP3             | 2.64                             | 3.96                              | 5.67          | 7.47                              | 10.37                             |
| BP8             | -6.87                            | -3.76                             | -2.01         | -0.40                             | 3.40                              |
| BPA             | -2.05                            | 0.05                              | 1.17          | 1.99                              | 3.57                              |
| BPAF            | -5.89                            | -5.62                             | -5.24         | -4.65                             | -4.32                             |
| BPAP            | -4.11                            | -2.77                             | -1.83         | -0.94                             | 0.57                              |
| BPB             | -5.70                            | -5.16                             | -4.32         | -3.12                             | -1.81                             |
| BPF             | -2.15                            | 0.68                              | 1.94          | 3.24                              | 4.47                              |
| BPP             | -7.89                            | -5.58                             | -3.39         | -2.15                             | -0.49                             |
| BPS             | -4.28                            | -2.28                             | -0.98         | 0.29                              | 1.94                              |
| BPZ             | -5.89                            | -5.62                             | -5.27         | -4.65                             | -4.32                             |
| BUPB            | -4.39                            | -2.50                             | -1.45         | -0.03                             | 3.33                              |
| BZPB            | -4.87                            | -4.49                             | -3.97         | -3.32                             | -1.68                             |
| DCP24           | -1.23                            | 0.51                              | 1.57          | 2.49                              | 3.60                              |
| DCP25           | -6.72                            | 0.43                              | 1.59          | 2.63                              | 5.60                              |
| DHB34           | 5.68                             | 6.54                              | 7.49          | 8.29                              | 9.23                              |
| ETPB            | -1.93                            | -0.60                             | 0.43          | 1.83                              | 6.02                              |
| HB4             | 9.34                             | 10.08                             | 10.7          | 11.39                             | 12.66                             |
| HEPB            | -4.89                            | -4.62                             | -4.27         | -3.68                             | -3.32                             |
| MEPB            | 2.58                             | 3.86                              | 6.04          | 8.33                              | 11.38                             |
| OH4BP           | -0.77                            | 0.42                              | 0.97          | 1.70                              | 3.47                              |
| OHETP           | -4.62                            | -3.65                             | -1.81         | -0.16                             | 1.76                              |
| OHMEP           | -1.66                            | 0.63                              | 1.91          | 3.64                              | 6.79                              |
| PCP             | -2.44                            | -0.83                             | 0.03          | 0.81                              | 1.96                              |
| PRPB            | -0.78                            | 1.29                              | 3.05          | 5.34                              | 8.63                              |
| TCC             | -4.89                            | -4.60                             | -4.20         | -3.43                             | -1.58                             |
| TCP245          | -4.70                            | -4.20                             | -3.32         | -2.43                             | -1.10                             |
| TCP246          | -1.25                            | 0.00                              | 0.62          | 1.31                              | 2.54                              |
| TCS             | -0.99                            | 1.45                              | 3.04          | 4.77                              | 7.48                              |

| <b>Chemical</b>   | <b>5<sup>th</sup> Percentile</b> | <b>25<sup>th</sup> Percentile</b> | <b>Median</b> | <b>75<sup>th</sup> Percentile</b> | <b>95<sup>th</sup> Percentile</b> |
|-------------------|----------------------------------|-----------------------------------|---------------|-----------------------------------|-----------------------------------|
| <i>Phthalates</i> |                                  |                                   |               |                                   |                                   |
| MBZP              | 2.13                             | 3.82                              | 4.92          | 6.07                              | 8.01                              |
| MCHP              | -2.54                            | -2.25                             | -1.88         | -1.11                             | -0.09                             |
| MCHPP             | -4.84                            | -4.43                             | -3.84         | -2.96                             | 4.01                              |
| MCINP             | 0.47                             | 1.85                              | 2.62          | 3.43                              | 4.55                              |
| MCIOP             | 1.83                             | 3.50                              | 4.41          | 5.36                              | 6.99                              |
| MCMHP             | 0.58                             | 3.00                              | 3.91          | 5.11                              | 6.93                              |
| MCPP              | 0.26                             | 1.56                              | 2.45          | 3.34                              | 4.75                              |
| MECPP             | 2.50                             | 4.22                              | 4.96          | 6.09                              | 7.94                              |
| MEHHP             | 3.21                             | 4.54                              | 5.46          | 6.64                              | 8.54                              |

|              |       |       |       |       |       |
|--------------|-------|-------|-------|-------|-------|
| <b>MEOHP</b> | 1.77  | 3.22  | 4.24  | 5.40  | 7.25  |
| <b>MEP</b>   | 3.35  | 4.61  | 5.43  | 6.31  | 8.33  |
| <b>MHPP</b>  | -2.30 | -1.15 | 0.18  | 1.49  | 3.89  |
| <b>MHXP</b>  | -2.39 | -1.77 | -1.00 | 4.05  | 7.25  |
| <b>MIBP</b>  | 2.36  | 3.54  | 4.40  | 5.25  | 6.74  |
| <b>MINP</b>  | -8.21 | -7.95 | -7.59 | -7.05 | -6.64 |
| <b>MIPP</b>  | -2.57 | -2.28 | -1.91 | -1.28 | -1.00 |
| <b>MMP</b>   | 0.88  | 1.34  | 2.22  | 3.05  | 4.96  |
| <b>MNBP</b>  | 3.56  | 4.58  | 5.45  | 6.27  | 7.59  |
| <b>MOP</b>   | -2.57 | -2.30 | -1.95 | -1.33 | -1.00 |
| <b>MPEP</b>  | -1.57 | -1.28 | -0.91 | -0.33 | 0.00  |

| <b>Chemical</b>          | <b>5<sup>th</sup> Percentile</b> | <b>25<sup>th</sup> Percentile</b> | <b>Median</b> | <b>75<sup>th</sup> Percentile</b> | <b>95<sup>th</sup> Percentile</b> |
|--------------------------|----------------------------------|-----------------------------------|---------------|-----------------------------------|-----------------------------------|
| <i><b>Pesticides</b></i> |                                  |                                   |               |                                   |                                   |
| <b>DMP</b>               | 0.21                             | 1.88                              | 3.31          | 4.41                              | 6.38                              |
| <b>DEP</b>               | -0.94                            | 1.33                              | 2.39          | 3.65                              | 5.04                              |
| <b>DMTP</b>              | -4.54                            | 0.12                              | 1.67          | 3.79                              | 5.62                              |
| <b>DETP</b>              | -4.18                            | -2.13                             | -0.8          | 0.79                              | 2.66                              |
| <b>DMDP</b>              | -6.02                            | -3.09                             | -1.69         | -0.03                             | 3.49                              |
| <b>DEDP</b>              | -5.89                            | -5.60                             | -5.20         | -4.65                             | -4.32                             |

| <b>Chemical</b>              | <b>5<sup>th</sup> Percentile</b> | <b>25<sup>th</sup> Percentile</b> | <b>Median</b> | <b>75<sup>th</sup> Percentile</b> | <b>95<sup>th</sup> Percentile</b> |
|------------------------------|----------------------------------|-----------------------------------|---------------|-----------------------------------|-----------------------------------|
| <i><b>Trace Elements</b></i> |                                  |                                   |               |                                   |                                   |
| <b>As</b>                    | 1.98                             | 2.90                              | 3.60          | 4.29                              | 5.70                              |
| <b>Be</b>                    | -7.07                            | -6.78                             | -6.38         | -5.70                             | -5.36                             |
| <b>Mo</b>                    | 4.86                             | 6.08                              | 6.65          | 7.34                              | 8.29                              |
| <b>Cd</b>                    | -8.76                            | -8.00                             | -5.53         | -4.40                             | -2.94                             |
| <b>Tl</b>                    | -3.56                            | -2.63                             | -2.23         | -1.67                             | -0.90s                            |
| <b>U</b>                     | -8.39                            | -7.26                             | -6.41         | -5.35                             | -3.94                             |

**Table S5: Distribution of log-transformed (base =2) and specific gravity-adjusted urinary phenol, phthalate, and trace element biomarker concentrations (ng/ml) among 248 TD participants included in the analysis**

| Chemical       | 5 <sup>th</sup> Percentile | 25 <sup>th</sup> Percentile | Median | 75 <sup>th</sup> Percentile | 95 <sup>th</sup> Percentile |
|----------------|----------------------------|-----------------------------|--------|-----------------------------|-----------------------------|
| <i>Phenols</i> |                            |                             |        |                             |                             |
| BP1            | 0.90                       | 2.78                        | 4.41   | 6.13                        | 12.89                       |
| BP2            | -3.84                      | -3.52                       | -3.15  | -2.64                       | -0.97                       |
| BP3            | 2.76                       | 4.53                        | 6.06   | 7.83                        | 10.57                       |
| BP8            | -6.62                      | -3.29                       | -1.62  | 0.12                        | 3.61                        |
| BPA            | -1.16                      | 0.19                        | 1.16   | 1.97                        | 3.50                        |
| BPAF           | -5.84                      | -5.60                       | -5.33  | -4.89                       | -4.32                       |
| BPAP           | -3.96                      | -2.37                       | -1.56  | -0.88                       | -0.06                       |
| BPB            | -5.67                      | -5.16                       | -4.32  | -3.34                       | -1.99                       |
| BPF            | -2.20                      | 0.27                        | 1.40   | 2.95                        | 4.36                        |
| BPP            | -7.97                      | -6.64                       | -3.70  | -2.14                       | -0.35                       |
| BPS            | -4.32                      | -2.67                       | -1.64  | -0.38                       | 2.09                        |
| BPZ            | -5.84                      | -5.60                       | -5.33  | -4.88                       | -4.32                       |
| BUPB           | -4.47                      | -2.58                       | -1.27  | 0.08                        | 3.80                        |
| BZPB           | -4.84                      | -4.54                       | -4.22  | -3.65                       | -2.24                       |
| DCP24          | -5.87                      | 0.06                        | 1.35   | 2.41                        | 3.93                        |
| DCP25          | -6.55                      | 0.89                        | 2.05   | 2.85                        | 6.50                        |
| DHB34          | 4.88                       | 6.41                        | 7.27   | 7.91                        | 9.01                        |
| ETPB           | -2.25                      | -0.96                       | 0.17   | 1.52                        | 5.50                        |
| HB4            | 9.08                       | 10.03                       | 10.45  | 11.1                        | 12.76                       |
| HEPB           | -4.84                      | -4.60                       | -4.33  | -3.89                       | -3.32                       |
| MEPB           | 1.91                       | 3.49                        | 4.87   | 7.11                        | 10.92                       |
| OH4BP          | -1.16                      | 0.25                        | 0.97   | 1.64                        | 3.94                        |
| OHETP          | -4.56                      | -3.54                       | -1.35  | 0.02                        | 2.11                        |
| OHMEP          | -3.32                      | 0.64                        | 2.28   | 3.75                        | 6.34                        |
| PCP            | -2.67                      | -0.63                       | 0.09   | 0.99                        | 2.23                        |
| PRPB           | -1.64                      | 0.79                        | 2.32   | 4.01                        | 8.25                        |
| TCC            | -4.84                      | -4.54                       | -4.22  | -3.70                       | -1.55                       |
| TCP245         | -4.70                      | -4.14                       | -3.32  | -2.37                       | -0.78                       |
| TCP246         | -0.95                      | -0.05                       | 0.54   | 1.22                        | 2.90                        |
| TCS            | -3.11                      | 1.50                        | 2.93   | 4.71                        | 7.30                        |

| Chemical          | 5 <sup>th</sup> Percentile | 25 <sup>th</sup> Percentile | Median | 75 <sup>th</sup> Percentile | 95 <sup>th</sup> Percentile |
|-------------------|----------------------------|-----------------------------|--------|-----------------------------|-----------------------------|
| <i>Phthalates</i> |                            |                             |        |                             |                             |
| MBZP              | 2.23                       | 3.95                        | 5.00   | 6.24                        | 8.21                        |
| MCHP              | -2.51                      | -2.23                       | -1.91  | -1.47                       | -0.76                       |
| MCHPP             | -4.84                      | -4.49                       | -4.01  | -3.32                       | 3.84                        |
| MCINP             | 0.54                       | 1.76                        | 2.39   | 3.21                        | 4.86                        |
| MCIOP             | 2.29                       | 3.63                        | 4.33   | 5.06                        | 6.47                        |
| MCMHP             | 1.43                       | 3.32                        | 4.17   | 5.02                        | 6.13                        |
| MCPP              | 0.52                       | 1.72                        | 2.46   | 3.20                        | 4.29                        |

|       |       |       |       |       |       |
|-------|-------|-------|-------|-------|-------|
| MECPP | 3.19  | 4.31  | 5.10  | 6.02  | 7.13  |
| MEHHP | 3.45  | 4.73  | 5.52  | 6.48  | 7.89  |
| MEOHP | 2.28  | 3.44  | 4.24  | 5.28  | 6.66  |
| MEP   | 3.70  | 4.67  | 5.37  | 6.31  | 8.33  |
| MHPP  | -1.90 | -0.63 | 0.50  | 1.77  | 3.45  |
| MHXP  | -2.37 | -1.66 | -0.23 | 2.85  | 6.95  |
| MIBP  | 2.27  | 3.42  | 4.14  | 5.07  | 6.29  |
| MINP  | -8.16 | -7.92 | -7.66 | -7.21 | -6.64 |
| MIPP  | -2.52 | -2.28 | -2.00 | -1.52 | -1.00 |
| MMP   | 0.92  | 1.34  | 1.99  | 2.91  | 4.34  |
| MNBP  | 3.51  | 4.72  | 5.41  | 6.10  | 7.18  |
| MOP   | -2.52 | -2.28 | -2.00 | -1.52 | -1.00 |
| MPEP  | -1.52 | -1.28 | -1.00 | -0.52 | 0.00  |

| Chemical          | 5 <sup>th</sup> Percentile | 25 <sup>th</sup> Percentile | Median | 75 <sup>th</sup> Percentile | 95 <sup>th</sup> Percentile |
|-------------------|----------------------------|-----------------------------|--------|-----------------------------|-----------------------------|
| <i>Pesticides</i> |                            |                             |        |                             |                             |
| DMP               | 0.23                       | 1.76                        | 3.00   | 4.22                        | 5.67                        |
| DEP               | -0.58                      | 0.73                        | 1.66   | 2.80                        | 4.29                        |
| DMTP              | -2.05                      | 0.27                        | 1.88   | 3.64                        | 5.54                        |
| DETP              | -4.10                      | -2.32                       | -1.16  | 0.06                        | 2.33                        |
| DMDP              | -6.26                      | -3.31                       | -1.85  | 0.02                        | 2.45                        |
| DEDP              | -5.84                      | -5.57                       | -5.27  | -4.80                       | -4.32                       |

| Chemical              | 5 <sup>th</sup> Percentile | 25 <sup>th</sup> Percentile | Median | 75 <sup>th</sup> Percentile | 95 <sup>th</sup> Percentile |
|-----------------------|----------------------------|-----------------------------|--------|-----------------------------|-----------------------------|
| <i>Trace Elements</i> |                            |                             |        |                             |                             |
| As                    | 2.01                       | 2.77                        | 3.40   | 4.02                        | 5.33                        |
| Be                    | -7.03                      | -6.76                       | -6.45  | -5.98                       | -5.51                       |
| Mo                    | 5.13                       | 6.03                        | 6.59   | 7.03                        | 7.83                        |
| Cd                    | -8.82                      | -6.72                       | -5.38  | -4.35                       | -3.21                       |
| Tl                    | s-3.51                     | -2.77                       | -2.25  | -1.82                       | -1.08                       |
| U                     | -8.70                      | -7.47                       | -6.68  | -5.90s                      | -4.54                       |

**Table S6: Distribution of log-transformed (base =2) and specific gravity-unadjusted urinary phenol, phthalate, and trace element biomarker concentrations (ng/ml) among 479 participants included in the analysis**

| <b>Chemical</b> | <b>5<sup>th</sup> Percentile</b> | <b>25<sup>th</sup> Percentile</b> | <b>Median</b> | <b>75<sup>th</sup> Percentile</b> | <b>95<sup>th</sup> Percentile</b> |
|-----------------|----------------------------------|-----------------------------------|---------------|-----------------------------------|-----------------------------------|
| <i>Phenols</i>  |                                  |                                   |               |                                   |                                   |
| BP1             | 0.52                             | 2.39                              | 3.88          | 5.90                              | 12.71                             |
| BP2             | -3.32                            | -3.32                             | -3.32         | -3.32                             | -0.94                             |
| BP3             | 2.41                             | 4.14                              | 5.72          | 7.70                              | 10.64                             |
| BP8             | -6.64                            | -3.74                             | -1.96         | -0.13                             | 3.58                              |
| BPA             | -1.99                            | 0.16                              | 1.06          | 2.02                              | 3.48                              |
| BPAF            | -5.32                            | -5.32                             | -5.32         | -5.32                             | -5.32                             |
| BPAP            | -4.32                            | -2.63                             | -1.78         | -1.02                             | 0.16                              |
| BPB             | -5.32                            | -5.32                             | -5.32         | -3.36                             | -1.94                             |
| BPF             | -2.00                            | 0.36                              | 1.53          | 2.79                              | 4.26                              |
| BPP             | -7.64                            | -6.42                             | -3.54         | -2.31                             | -0.71                             |
| BPS             | -5.32                            | -2.69                             | -1.45         | -0.20                             | 1.81                              |
| BPZ             | -5.32                            | -5.32                             | -5.32         | -5.32                             | -5.32                             |
| BUPB            | -5.32                            | -2.79                             | -1.37         | -0.06                             | 3.33                              |
| BZPB            | -4.32                            | -4.32                             | -4.32         | -4.32                             | -1.90                             |
| DCP24           | -4.09                            | 0.17                              | 1.34          | 2.45                              | 3.70                              |
| DCP25           | -6.64                            | 0.53                              | 1.71          | 2.68                              | 5.75                              |
| DHB34           | 5.05                             | 6.32                              | 7.20          | 8.08                              | 8.98                              |
| ETPB            | -2.54                            | -0.84                             | 0.23          | 1.58                              | 5.63                              |
| HB4             | 8.64                             | 9.92                              | 10.5          | 11.15                             | 12.62                             |
| HEPB            | -4.32                            | -4.32                             | -4.32         | -4.32                             | -4.32                             |
| MEPB            | 1.78                             | 3.58                              | 5.22          | 7.37                              | 11.15                             |
| OH4BP           | -1.04                            | 0.14                              | 0.79          | 1.63                              | 3.61                              |
| OHETP           | -4.32                            | -4.32                             | -1.60         | 0.01                              | 2.02                              |
| OHMEP           | -2.54                            | 0.40                              | 2.11          | 3.70                              | 6.65                              |
| PCP             | -3.39                            | -0.90                             | -0.07         | 0.88                              | 2.23                              |
| PRPB            | -1.44                            | 0.87                              | 2.41          | 4.46                              | 8.47                              |
| TCC             | -4.32                            | -4.32                             | -4.32         | -4.32                             | -1.62                             |
| TCP245          | -4.32                            | -4.32                             | -4.32         | -2.45                             | -1.02                             |
| TCP246          | -1.52                            | -0.21                             | 0.52          | 1.28                              | 2.77                              |
| TCS             | -1.98                            | 1.30                              | 2.80          | 4.67                              | 7.48                              |

| <b>Chemical</b>   | <b>5<sup>th</sup> Percentile</b> | <b>25<sup>th</sup> Percentile</b> | <b>Median</b> | <b>75<sup>th</sup> Percentile</b> | <b>95<sup>th</sup> Percentile</b> |
|-------------------|----------------------------------|-----------------------------------|---------------|-----------------------------------|-----------------------------------|
| <i>Phthalates</i> |                                  |                                   |               |                                   |                                   |
| MBZP              | 2.01                             | 3.75                              | 4.87          | 6.11                              | 8.14                              |
| MCHP              | -2.00                            | -2.00                             | -2.00         | -2.00                             | -0.38                             |
| MCHPP             | -4.32                            | -4.32                             | -4.32         | -3.15                             | 3.95                              |
| MCINP             | -0.09                            | 1.66                              | 2.41          | 3.27                              | 4.81                              |
| MCIOP             | 1.63                             | 3.37                              | 4.26          | 5.25                              | 6.73                              |
| MCMHP             | 0.85                             | 2.98                              | 3.96          | 5.00                              | 6.39                              |
| MCPP              | -0.08                            | 1.45                              | 2.42          | 3.28                              | 4.55                              |
| MECPP             | 2.25                             | 4.08                              | 5.02          | 6.04                              | 7.72                              |
| MEHHP             | 2.89                             | 4.45                              | 5.42          | 6.54                              | 8.18                              |

|       |       |       |       |       |        |
|-------|-------|-------|-------|-------|--------|
| MEOHP | 1.42  | 3.15  | 4.21  | 5.21  | 6.92   |
| MEP   | 3.22  | 4.41  | 5.38  | 6.29  | 8.25   |
| MHPP  | -2.00 | -2.00 | 0.32  | 1.48  | 3.88   |
| MHXP  | -2.00 | -2.00 | -0.55 | 3.44  | 7.32   |
| MIBP  | 1.97  | 3.38  | 4.25  | 5.11  | 6.40   |
| MINP  | -7.64 | -7.64 | -7.64 | -7.64 | -7.64  |
| MIPP  | -2.00 | -2.00 | -2.00 | -2.00 | -2.00  |
| MMP   | 1.32  | 1.32  | 1.32  | 2.96  | 4.86   |
| MNBP  | 2.85  | 4.43  | 5.33  | 6.22  | 7.51   |
| MOP   | -2.00 | -2.00 | -2.00 | -2.00 | -2.00  |
| MPEP  | -1.00 | -1.00 | -1.00 | -1.00 | -1.00s |

| Chemical          | 5 <sup>th</sup> Percentile | 25 <sup>th</sup> Percentile | Median | 75 <sup>th</sup> Percentile | 95 <sup>th</sup> Percentile |
|-------------------|----------------------------|-----------------------------|--------|-----------------------------|-----------------------------|
| <i>Pesticides</i> |                            |                             |        |                             |                             |
| DMP               | -0.17                      | 1.68                        | 3.04   | 4.34                        | 6.17                        |
| DEP               | -1.04                      | 0.74                        | 1.92   | 3.20                        | 4.81                        |
| DMTP              | -3.96                      | -0.01                       | 1.69   | 3.65                        | 5.63                        |
| DETP              | -4.42                      | -2.43                       | -1.05  | 0.34                        | 2.40                        |
| DMDP              | -6.64                      | -3.48                       | -1.84  | -0.04                       | 2.79                        |
| DEDP              | -5.32                      | -5.32                       | -5.32  | -5.32                       | -5.32                       |

| Chemical              | 5 <sup>th</sup> Percentile | 25 <sup>th</sup> Percentile | Median | 75 <sup>th</sup> Percentile | 95 <sup>th</sup> Percentile |
|-----------------------|----------------------------|-----------------------------|--------|-----------------------------|-----------------------------|
| <i>Trace Elements</i> |                            |                             |        |                             |                             |
| As                    | 1.37                       | 2.69                        | 3.45   | 4.15                        | 5.42                        |
| Be                    | -6.51                      | -6.51                       | -6.51  | -6.51                       | -5.37                       |
| Mo                    | 4.33                       | 5.80                        | 6.55   | 7.20s                       | 8.22                        |
| Cd                    | -8.43                      | -8.43                       | -5.64  | -4.44                       | -3.18                       |
| Tl                    | -3.91                      | -2.89                       | -2.25  | -1.77                       | -0.91                       |
| U                     | -8.78                      | -7.48                       | -6.67  | -5.75                       | -4.24                       |



**Table S7: Distribution of log-transformed (base =2) and specific gravity-unadjusted urinary phenol, phthalate, and trace element biomarker concentrations (ng/ml) among 231 ASD participants included in the analysis**

| <b>Chemical</b> | <b>5<sup>th</sup> Percentile</b> | <b>25<sup>th</sup> Percentile</b> | <b>Median</b> | <b>75<sup>th</sup> Percentile</b> | <b>95<sup>th</sup> Percentile</b> |
|-----------------|----------------------------------|-----------------------------------|---------------|-----------------------------------|-----------------------------------|
| <i>Phenols</i>  |                                  |                                   |               |                                   |                                   |
| BP1             | 0.54                             | 2.11                              | 3.47          | 5.76                              | 12.53                             |
| BP2             | -3.32                            | -3.32                             | -3.32         | -3.32                             | -0.96                             |
| BP3             | 2.41                             | 3.89                              | 5.48          | 7.51                              | 10.36                             |
| BP8             | -6.64                            | -4.05                             | -2.27         | -0.34                             | 3.54                              |
| BPA             | -2.07                            | 0.14                              | 1.02          | 1.89                              | 3.49                              |
| BPAF            | -5.32                            | -5.32                             | -5.32         | -5.32                             | -5.32                             |
| BPAP            | -4.32                            | -2.81                             | -2.00         | -1.02                             | 0.09                              |
| BPB             | -5.32                            | -5.32                             | -5.32         | -3.31                             | -1.88                             |
| BPF             | -2.00                            | 0.57                              | 1.75          | 2.88                              | 4.41                              |
| BPP             | -7.64                            | -5.39                             | -3.45         | -2.25                             | -0.86                             |
| BPS             | -4.08                            | -2.49                             | -1.03         | 0.08                              | 1.81                              |
| BPZ             | -5.32                            | -5.32                             | -5.32         | -5.32                             | -5.32                             |
| BUPB            | -5.32                            | -2.83                             | -1.48         | -0.02                             | 2.97                              |
| BZPB            | -4.32                            | -4.32                             | -4.32         | -4.32                             | -1.70                             |
| DCP24           | -1.78                            | 0.38                              | 1.55          | 2.47                              | 3.68                              |
| DCP25           | -6.64                            | -0.13                             | 1.52          | 2.46                              | 5.42                              |
| DHB34           | 5.21                             | 6.46                              | 7.31          | 8.22                              | 9.10                              |
| ETPB            | -2.04                            | -0.66                             | 0.42          | 1.61                              | 6.01                              |
| HB4             | 8.73                             | 9.91                              | 10.61         | 11.35                             | 12.65                             |
| HEPB            | -4.32                            | -4.32                             | -4.32         | -4.32                             | -4.32                             |
| MEPB            | 2.25                             | 3.71                              | 5.80          | 7.94                              | 11.48                             |
| OH4BP           | -0.91                            | 0.12                              | 0.80          | 1.50                              | 3.15                              |
| OHETP           | -4.32                            | -4.32                             | -1.83         | -0.18                             | 1.91                              |
| OHMEP           | -1.85                            | 0.46                              | 1.81          | 3.52                              | 6.83                              |
| PCP             | -2.91                            | -0.99                             | -0.15         | 0.73                              | 2.05                              |
| PRPB            | -1.12                            | 0.89                              | 3.00          | 5.31                              | 8.50                              |
| TCC             | -4.32                            | -4.32                             | -4.32         | -4.32                             | -1.74                             |
| TCP245          | -4.32                            | -4.32                             | -4.32         | -2.46                             | -1.21                             |
| TCP246          | -1.61                            | -0.31                             | 0.53          | 1.31                              | 2.62                              |
| TCS             | -1.50                            | 1.26                              | 2.88          | 4.67                              | 7.74                              |

| <b>Chemical</b>   | <b>5<sup>th</sup> Percentile</b> | <b>25<sup>th</sup> Percentile</b> | <b>Median</b> | <b>75<sup>th</sup> Percentile</b> | <b>95<sup>th</sup> Percentile</b> |
|-------------------|----------------------------------|-----------------------------------|---------------|-----------------------------------|-----------------------------------|
| <i>Phthalates</i> |                                  |                                   |               |                                   |                                   |
| MBZP              | 2.01                             | 3.63                              | 4.87          | 5.95                              | 8.06                              |
| MCHP              | -2.00                            | -2.00                             | -2.00         | -2.00                             | -0.14                             |
| MCHPP             | -4.32                            | -4.32                             | -4.32         | -2.88                             | 3.68                              |
| MCINP             | -0.28                            | 1.70                              | 2.53          | 3.37                              | 4.65                              |
| MCIOP             | 1.12                             | 3.28                              | 4.33          | 5.33                              | 6.95                              |
| MCMHP             | 0.45                             | 2.65                              | 3.79          | 5.14                              | 6.75                              |
| MCPP              | -0.30                            | 1.28                              | 2.35          | 3.36                              | 4.77                              |
| MECPP             | 2.05                             | 3.90                              | 4.96          | 6.10                              | 8.01                              |
| MEHHP             | 2.47                             | 4.27                              | 5.39          | 6.58                              | 8.82                              |

|              |       |       |       |       |       |
|--------------|-------|-------|-------|-------|-------|
| <b>MEOHP</b> | 1.06  | 3.03  | 4.10  | 5.36  | 7.23  |
| <b>MEP</b>   | 3.12  | 4.37  | 5.28  | 6.28  | 8.31  |
| <b>MHPP</b>  | -2.00 | -2.00 | 0.20  | 1.27  | 4.19  |
| <b>MHXP</b>  | -2.00 | -2.00 | -0.89 | 3.81  | 7.38  |
| <b>MIBP</b>  | 1.84  | 3.50  | 4.36  | 5.16  | 6.53  |
| <b>MINP</b>  | -7.64 | -7.64 | -7.64 | -7.64 | -7.64 |
| <b>MIPP</b>  | -2.00 | -2.00 | -2.00 | -2.00 | -2.00 |
| <b>MMP</b>   | 1.32  | 1.32  | 1.32  | 3.00  | 4.94  |
| <b>MNBP</b>  | 2.71  | 4.34  | 5.30  | 6.29  | 7.74  |
| <b>MOP</b>   | -2.00 | -2.00 | -2.00 | -2.00 | -2.00 |
| <b>MPEP</b>  | -1.00 | -1.00 | -1.00 | -1.00 | -1.00 |

| <b>Chemical</b>          | <b>5<sup>th</sup> Percentile</b> | <b>25<sup>th</sup> Percentile</b> | <b>Median</b> | <b>75<sup>th</sup> Percentile</b> | <b>95<sup>th</sup> Percentile</b> |
|--------------------------|----------------------------------|-----------------------------------|---------------|-----------------------------------|-----------------------------------|
| <i><b>Pesticides</b></i> |                                  |                                   |               |                                   |                                   |
| <b>DMP</b>               | -0.44                            | 1.77                              | 3.17          | 4.37                              | 6.26                              |
| <b>DEP</b>               | -1.27                            | 1.13                              | 2.28          | 3.43                              | 4.87                              |
| <b>DMTP</b>              | -5.32                            | -0.04                             | 1.60          | 3.63                              | 5.52                              |
| <b>DETP</b>              | -4.42                            | -2.30                             | -0.88         | 0.70                              | 2.52                              |
| <b>DMDP</b>              | -6.64                            | -3.39                             | -1.84         | -0.08                             | 3.06                              |
| <b>DEDP</b>              | -5.32                            | -5.32                             | -5.32         | -5.32                             | -5.32                             |

| <b>Chemical</b>              | <b>5<sup>th</sup> Percentile</b> | <b>25<sup>th</sup> Percentile</b> | <b>Median</b> | <b>75<sup>th</sup> Percentile</b> | <b>95<sup>th</sup> Percentile</b> |
|------------------------------|----------------------------------|-----------------------------------|---------------|-----------------------------------|-----------------------------------|
| <i><b>Trace Elements</b></i> |                                  |                                   |               |                                   |                                   |
| <b>As</b>                    | 1.32                             | 2.78                              | 3.50          | 4.38                              | 5.70                              |
| <b>Be</b>                    | -6.51                            | -6.51                             | -6.51         | -6.51                             | -5.26                             |
| <b>Mo</b>                    | 4.13                             | 5.76                              | 6.60          | 7.37                              | 8.30                              |
| <b>Cd</b>                    | -8.43                            | -8.43                             | -5.65         | -4.62                             | -2.90s                            |
| <b>Tl</b>                    | -3.98                            | -2.87                             | -2.28         | -1.69                             | -0.84                             |
| <b>U</b>                     | -8.67                            | -7.30                             | -6.57         | -5.58                             | -4.13                             |

**Table S8: Distribution of log-transformed (base =2) and specific gravity-unadjusted urinary phenol, phthalate, and trace element biomarker concentrations (ng/ml) among 248 TD participants included in the analysis**

| <b>Chemical</b> | <b>5<sup>th</sup> Percentile</b> | <b>25<sup>th</sup> Percentile</b> | <b>Median</b> | <b>75<sup>th</sup> Percentile</b> | <b>95<sup>th</sup> Percentile</b> |
|-----------------|----------------------------------|-----------------------------------|---------------|-----------------------------------|-----------------------------------|
| <i>Phenols</i>  |                                  |                                   |               |                                   |                                   |
| BP1             | 0.53                             | 2.73                              | 4.31          | 6.04                              | 12.79                             |
| BP2             | -3.32                            | -3.32                             | -3.32         | -3.32                             | -0.89                             |
| BP3             | 2.63                             | 4.35                              | 6.01          | 7.76                              | 10.67                             |
| BP8             | -6.64                            | -3.43                             | -1.82         | 0.18                              | 3.72                              |
| BPA             | -1.58                            | 0.16                              | 1.08          | 2.11                              | 3.34                              |
| BPAF            | -5.32                            | -5.32                             | -5.32         | -5.32                             | -5.32                             |
| BPAP            | -4.32                            | -2.45                             | -1.66         | -1.02                             | 0.25                              |
| BPB             | -5.32                            | -5.32                             | -5.32         | -3.48                             | -2.11                             |
| BPF             | -2.00                            | 0.15                              | 1.39          | 2.61                              | 4.20                              |
| BPP             | -7.64                            | -7.64                             | -3.71         | -2.38                             | -0.65                             |
| BPS             | -5.32                            | -2.86                             | -1.63         | -0.42                             | 1.87                              |
| BPZ             | -5.32                            | -5.32                             | -5.32         | -5.32                             | -5.32                             |
| BUPB            | -5.32                            | -2.68                             | -1.3          | -0.14                             | 3.40                              |
| BZPB            | -4.32                            | -4.32                             | -4.32         | -4.32                             | -2.32                             |
| DCP24           | -6.64                            | -0.13                             | 1.22          | 2.44                              | 3.69                              |
| DCP25           | -6.64                            | 0.81                              | 1.85          | 2.84                              | 6.37                              |
| DHB34           | 4.86                             | 6.27                              | 7.05          | 7.83                              | 8.83                              |
| ETPB            | -2.85                            | -0.89                             | 0.08          | 1.5                               | 5.48                              |
| HB4             | 8.44                             | 9.92                              | 10.42         | 10.97                             | 12.52                             |
| HEPB            | -4.32                            | -4.32                             | -4.32         | -4.32                             | -4.32                             |
| MEPB            | 1.54                             | 3.46                              | 4.75          | 6.89                              | 10.82                             |
| OH4BP           | -1.22                            | 0.14                              | 0.79          | 1.74                              | 3.71                              |
| OHETP           | -4.32                            | -4.32                             | -1.45         | 0.09                              | 2.08                              |
| OHMEP           | -4.32                            | 0.3                               | 2.33          | 3.85                              | 6.30                              |
| PCP             | -3.42                            | -0.83                             | -0.02         | 0.99                              | 2.26                              |
| PRPB            | -1.89                            | 0.85                              | 2.19          | 4.15                              | 7.98                              |
| TCC             | -4.32                            | -4.32                             | -4.32         | -4.32                             | -1.54                             |
| TCP245          | -4.32                            | -4.32                             | -3.31         | -2.42                             | -0.64                             |
| TCP246          | -1.43                            | -0.19                             | 0.48          | 1.26                              | 2.81                              |
| TCS             | -2.86                            | 1.34                              | 2.73          | 4.67                              | 7.40                              |

| <b>Chemical</b>   | <b>5<sup>th</sup> Percentile</b> | <b>25<sup>th</sup> Percentile</b> | <b>Median</b> | <b>75<sup>th</sup> Percentile</b> | <b>95<sup>th</sup> Percentile</b> |
|-------------------|----------------------------------|-----------------------------------|---------------|-----------------------------------|-----------------------------------|
| <i>Phthalates</i> |                                  |                                   |               |                                   |                                   |
| MBZP              | 2.06                             | 3.90                              | 4.89          | 6.38                              | 8.13                              |
| MCHP              | -2.00                            | -2.00                             | -2.00         | -2.00                             | -0.81                             |
| MCHPP             | -4.32                            | -4.32                             | -4.32         | -4.32                             | 4.04                              |
| MCINP             | 0.08                             | 1.62                              | 2.32          | 3.15                              | 5.02                              |
| MCIOP             | 2.05                             | 3.48                              | 4.24          | 5.22                              | 6.51                              |
| MCMHP             | 1.15                             | 3.20                              | 4.14          | 4.94                              | 6.20                              |
| MCPP              | 0.24                             | 1.53                              | 2.49          | 3.21                              | 4.34                              |
| MECPP             | 2.72                             | 4.22                              | 5.09          | 5.89                              | 7.42                              |
| MEHHP             | 2.97                             | 4.65                              | 5.53          | 6.50                              | 7.98                              |

|       |       |       |       |       |        |
|-------|-------|-------|-------|-------|--------|
| MEOHP | 1.62  | 3.29  | 4.26  | 5.16  | 6.72   |
| MEP   | 3.54  | 4.42  | 5.44  | 6.32  | 8.13   |
| MHPP  | -2.00 | -0.61 | 0.51  | 1.64  | 3.75   |
| MHXP  | -2.00 | -2.00 | -0.39 | 3.12  | 7.03   |
| MIBP  | 2.04  | 3.23  | 4.15  | 5.03  | 6.20   |
| MINP  | -7.64 | -7.64 | -7.64 | -7.64 | -7.64  |
| MIPP  | -2.00 | -2.00 | -2.00 | -2.00 | -2.00  |
| MMP   | 1.32  | 1.32  | 1.32  | 2.89  | 4.52   |
| MNBP  | 3.28  | 4.58  | 5.38  | 6.19  | 7.28   |
| MOP   | -2.00 | -2.00 | -2.00 | -2.00 | -2.00  |
| MPEP  | -1.00 | -1.00 | -1.00 | -1.00 | -1.00s |

| Chemical          | 5 <sup>th</sup> Percentile | 25 <sup>th</sup> Percentile | Median | 75 <sup>th</sup> Percentile | 95 <sup>th</sup> Percentile |
|-------------------|----------------------------|-----------------------------|--------|-----------------------------|-----------------------------|
| <i>Pesticides</i> |                            |                             |        |                             |                             |
| DMP               | 0.09                       | 1.65                        | 2.96   | 4.31                        | 6.13                        |
| DEP               | -0.82                      | 0.53                        | 1.58   | 2.91                        | 4.39                        |
| DMTP              | -2.23                      | 0.05                        | 1.91   | 3.66                        | 5.72                        |
| DETP              | -4.42                      | -2.49                       | -1.23  | 0.08                        | 1.97                        |
| DMDP              | -6.64                      | -3.59                       | -1.88  | 0.06                        | 2.52                        |
| DEDP              | -5.32                      | -5.32                       | -5.32  | -5.32                       | -5.32                       |

| Chemical              | 5 <sup>th</sup> Percentile | 25 <sup>th</sup> Percentile | Median | 75 <sup>th</sup> Percentile | 95 <sup>th</sup> Percentile |
|-----------------------|----------------------------|-----------------------------|--------|-----------------------------|-----------------------------|
| <i>Trace Elements</i> |                            |                             |        |                             |                             |
| As                    | 1.37                       | 2.60                        | 3.36   | 4.03                        | 5.10                        |
| Be                    | -6.51                      | -6.51                       | -6.51  | -6.51                       | -6.51                       |
| Mo                    | 4.67                       | 5.91                        | 6.53   | 7.03                        | 7.90s                       |
| Cd                    | -8.43                      | -6.82                       | -5.61  | -4.42                       | -3.28                       |
| Tl                    | -3.87                      | -2.90                       | -2.23  | -1.83                       | -1.21                       |
| U                     | -8.83                      | -7.57                       | -6.79  | -5.93                       | -4.55                       |

**Table S9: Univariate associations between ASD diagnosis and log-transformed (base =2), specific gravity-adjusted urinary phenol, phthalate, and trace element biomarker concentrations**

| <b>Chemical</b> | <b>OR</b> | <b>95% CI</b> | <b>pvalue</b> |
|-----------------|-----------|---------------|---------------|
| <b>BP1</b>      | 0.96      | (0.91, 1.02)  | 0.183         |
| <b>BP2</b>      | 0.99      | (0.82, 1.21)  | 0.953         |
| <b>BP3</b>      | 0.97      | (0.9, 1.05)   | 0.415         |
| <b>BP8</b>      | 0.94      | (0.89, 1.01)  | 0.080         |
| <b>BPA</b>      | 0.98      | (0.87, 1.11)  | 0.780         |
| <b>BPAF</b>     | 1.33      | (0.93, 1.9)   | 0.119         |
| <b>BPAP</b>     | 0.94      | (0.81, 1.08)  | 0.374         |
| <b>BPB</b>      | 1.10      | (0.95, 1.28)  | 0.212         |
| <b>BPF</b>      | 1.12      | (1.01, 1.24)  | 0.034         |
| <b>BPP</b>      | 1.02      | (0.94, 1.1)   | 0.631         |
| <b>BPS</b>      | 1.06      | (0.95, 1.18)  | 0.297         |
| <b>BPZ</b>      | 1.23      | (0.88, 1.73)  | 0.224         |
| <b>BUPB</b>     | 1.01      | (0.93, 1.09)  | 0.799         |
| <b>BZPB</b>     | 1.24      | (1.01, 1.52)  | 0.039         |
| <b>DCP24</b>    | 1.10      | (1.01, 1.2)   | 0.029         |
| <b>DCP25</b>    | 0.98      | (0.92, 1.04)  | 0.567         |
| <b>DHB34</b>    | 1.19      | (1.02, 1.4)   | 0.03          |
| <b>ETPB</b>     | 1.05      | (0.98, 1.14)  | 0.186         |
| <b>HB4</b>      | 1.15      | (0.97, 1.35)  | 0.098         |
| <b>HEPB</b>     | 1.30      | (0.9, 1.87)   | 0.166         |
| <b>MEPB</b>     | 1.13      | (1.06, 1.22)  | <0.001        |
| <b>OH4BP</b>    | 0.98      | (0.85, 1.12)  | 0.74          |
| <b>OHETP</b>    | 0.89      | (0.81, 0.97)  | 0.011         |
| <b>OHMEP</b>    | 1.00      | (0.93, 1.08)  | 0.921         |
| <b>PCP</b>      | 0.99      | (0.88, 1.13)  | 0.922         |
| <b>PRPB</b>     | 1.09      | (1.02, 1.16)  | 0.011         |
| <b>TCC</b>      | 0.95      | (0.83, 1.1)   | 0.497         |
| <b>TCP245</b>   | 0.94      | (0.81, 1.1)   | 0.466         |
| <b>TCP246</b>   | 0.95      | (0.82, 1.11)  | 0.544         |
| <b>TCS</b>      | 1.05      | (0.97, 1.12)  | 0.214         |
| <b>MBZP</b>     | 1.01      | (0.91, 1.12)  | 0.841         |
| <b>MCHP</b>     | 1.32      | (1.03, 1.7)   | 0.027         |
| <b>MCHPP</b>    | 1.04      | (0.96, 1.12)  | 0.301         |
| <b>MCINP</b>    | 1.00      | (0.9, 1.12)   | 0.961         |
| <b>MCIOP</b>    | 1.05      | (0.92, 1.19)  | 0.502         |
| <b>MCMHP</b>    | 0.97      | (0.89, 1.07)  | 0.597         |
| <b>MCPP</b>     | 1.02      | (0.88, 1.19)  | 0.751         |
| <b>MECPP</b>    | 1.07      | (0.95, 1.21)  | 0.287         |
| <b>MEHHP</b>    | 1.10      | (0.97, 1.26)  | 0.140         |
| <b>MEOHP</b>    | 1.10      | (0.97, 1.25)  | 0.133         |
| <b>MEP</b>      | 0.99      | (0.87, 1.12)  | 0.821         |
| <b>MHPP</b>     | 0.97      | (0.87, 1.09)  | 0.661         |
| <b>MHXP</b>     | 1.07      | (1, 1.14)     | 0.039         |
| <b>MIBP</b>     | 1.13      | (0.98, 1.3)   | 0.102         |

|             |      |              |       |
|-------------|------|--------------|-------|
| <b>MINP</b> | 1.26 | (0.86, 1.84) | 0.243 |
| <b>MIPP</b> | 1.40 | (1.02, 1.91) | 0.036 |
| <b>MMP</b>  | 1.05 | (0.91, 1.21) | 0.545 |
| <b>MNBP</b> | 1.11 | (0.95, 1.3)  | 0.177 |
| <b>MOP</b>  | 1.18 | (0.87, 1.59) | 0.290 |
| <b>MPEP</b> | 1.40 | (1, 1.96)    | 0.048 |
| <b>DMP</b>  | 1.05 | (0.95, 1.16) | 0.374 |
| <b>DEP</b>  | 1.14 | (1.02, 1.27) | 0.023 |
| <b>DMTP</b> | 0.97 | (0.91, 1.05) | 0.462 |
| <b>DETP</b> | 1.09 | (0.99, 1.2)  | 0.077 |
| <b>DMDP</b> | 1.04 | (0.97, 1.12) | 0.273 |
| <b>DEDP</b> | 1.11 | (0.86, 1.45) | 0.423 |
| <b>As</b>   | 1.24 | (1.03, 1.49) | 0.021 |
| <b>Be</b>   | 1.49 | (1.08, 2.07) | 0.016 |
| <b>Mo</b>   | 1.11 | (0.92, 1.35) | 0.285 |
| <b>Cd</b>   | 0.92 | (0.84, 1.01) | 0.079 |
| <b>Tl</b>   | 1.20 | (0.94, 1.53) | 0.139 |
| <b>U</b>    | 1.25 | (1.08, 1.45) | 0.003 |

All models were adjusted for covariates. Pvalues are not adjusted for multi-comparison error.

**Table S10: Univariate associations between ASD diagnosis and log-transformed (base =2), specific gravity-unadjusted urinary phenol, phthalate, and trace element biomarker concentrations**

| <b>Chemical</b> | <b>OR</b> | <b>95% CI</b> | <b>pvalue</b> |
|-----------------|-----------|---------------|---------------|
| <b>BP1</b>      | 0.96      | (0.91, 1.02)  | 0.152         |
| <b>BP2</b>      | 0.93      | (0.75, 1.14)  | 0.473         |
| <b>BP3</b>      | 0.96      | (0.89, 1.04)  | 0.310         |
| <b>BP8</b>      | 0.94      | (0.88, 1)     | 0.062         |
| <b>BPA</b>      | 0.97      | (0.87, 1.08)  | 0.578         |
| <b>BPAP</b>     | 0.91      | (0.79, 1.05)  | 0.205         |
| <b>BPB</b>      | 1.06      | (0.91, 1.22)  | 0.450         |
| <b>BPF</b>      | 1.11      | (0.99, 1.23)  | 0.065         |
| <b>BPP</b>      | 1.01      | (0.93, 1.09)  | 0.806         |
| <b>BPS</b>      | 1.04      | (0.94, 1.15)  | 0.473         |
| <b>BPZ</b>      | 1.19      | (0.57, 2.52)  | 0.642         |
| <b>BUPB</b>     | 1.00      | (0.92, 1.08)  | 0.995         |
| <b>BZPB</b>     | 1.20      | (0.96, 1.5)   | 0.108         |
| <b>DCP24</b>    | 1.08      | (1, 1.17)     | 0.057         |
| <b>DCP25</b>    | 0.98      | (0.92, 1.04)  | 0.458         |
| <b>DHB34</b>    | 1.14      | (0.97, 1.32)  | 0.106         |
| <b>ETPB</b>     | 1.04      | (0.97, 1.12)  | 0.282         |
| <b>HB4</b>      | 1.09      | (0.93, 1.27)  | 0.287         |
| <b>MEPB</b>     | 1.12      | (1.05, 1.2)   | 0.001         |
| <b>OH4BP</b>    | 0.95      | (0.84, 1.09)  | 0.493         |
| <b>OHETP</b>    | 0.88      | (0.81, 0.97)  | 0.006         |
| <b>OHMEP</b>    | 1.00      | (0.93, 1.07)  | 0.891         |
| <b>PCP</b>      | 0.97      | (0.87, 1.09)  | 0.660         |
| <b>PRPB</b>     | 1.08      | (1.01, 1.15)  | 0.022         |
| <b>TCC</b>      | 0.91      | (0.78, 1.07)  | 0.255         |
| <b>TCP245</b>   | 0.92      | (0.79, 1.07)  | 0.258         |
| <b>TCP246</b>   | 0.93      | (0.81, 1.07)  | 0.324         |
| <b>TCS</b>      | 1.03      | (0.96, 1.11)  | 0.350         |
| <b>MBZP</b>     | 1.00      | (0.9, 1.1)    | 0.927         |
| <b>MCHP</b>     | 1.29      | (0.97, 1.73)  | 0.083         |
| <b>MCHPP</b>    | 1.03      | (0.96, 1.11)  | 0.408         |
| <b>MCINP</b>    | 0.99      | (0.9, 1.1)    | 0.892         |
| <b>MCIOP</b>    | 1.02      | (0.9, 1.14)   | 0.793         |
| <b>MCMHP</b>    | 0.97      | (0.88, 1.06)  | 0.470         |
| <b>MCPP</b>     | 0.99      | (0.87, 1.13)  | 0.929         |
| <b>MECPP</b>    | 1.04      | (0.93, 1.17)  | 0.465         |
| <b>MEHHP</b>    | 1.07      | (0.95, 1.2)   | 0.291         |
| <b>MEOHP</b>    | 1.07      | (0.95, 1.2)   | 0.273         |
| <b>MEP</b>      | 0.97      | (0.86, 1.09)  | 0.611         |
| <b>MHPP</b>     | 0.96      | (0.86, 1.07)  | 0.466         |
| <b>MHXP</b>     | 1.06      | (1, 1.13)     | 0.062         |
| <b>MIBP</b>     | 1.08      | (0.95, 1.23)  | 0.240         |
| <b>MINP</b>     | 0.96      | (0.59, 1.55)  | 0.857         |
| <b>MIPP</b>     | 1.51      | (0.89, 2.57)  | 0.128         |

|             |      |               |       |
|-------------|------|---------------|-------|
| <b>MMP</b>  | 1.01 | (0.88, 1.16)  | 0.883 |
| <b>MNBP</b> | 1.06 | (0.92, 1.21)  | 0.413 |
| <b>MOP</b>  | 1.07 | (0.69, 1.64)  | 0.775 |
| <b>MPEP</b> | 2.08 | (0.92, 4.7)   | 0.077 |
| <b>DMP</b>  | 1.03 | (0.94, 1.13)  | 0.564 |
| <b>DEP</b>  | 1.11 | (1, 1.23)     | 0.056 |
| <b>DMTP</b> | 0.97 | (0.9, 1.04)   | 0.340 |
| <b>DETP</b> | 1.07 | (0.97, 1.17)  | 0.157 |
| <b>DMDP</b> | 1.03 | s(0.96, 1.11) | 0.401 |
| <b>DEDP</b> | 1.00 | (0.73, 1.37)  | 0.997 |
| <b>As</b>   | 1.15 | (0.97, 1.35)  | 0.100 |
| <b>Be</b>   | 1.89 | (1.11, 3.22)  | 0.020 |
| <b>Mo</b>   | 1.04 | (0.88, 1.23)  | 0.631 |
| <b>Cd</b>   | 0.91 | (0.82, 1)     | 0.043 |
| <b>Tl</b>   | 1.07 | (0.88, 1.32)  | 0.488 |
| <b>U</b>    | 1.21 | (1.05, 1.39)  | 0.010 |

All models were adjusted for covariates. Pvalues are not adjusted for multi-comparison error.



**Table S11: Results of SiRF from the three different data partitions**

- 70% training and 30% testing data

| <b>Interactions</b> | <b>Prevalence</b> | <b>Precision</b> | <b>Stability</b> |
|---------------------|-------------------|------------------|------------------|
| DEP+_U+             | 0.069             | 0.555            | 0.884            |
| <b>DEP+_TCP246+</b> | <b>0.065</b>      | <b>0.473</b>     | <b>0.568</b>     |
| <b>Cd+_DEP+</b>     | <b>0.109</b>      | <b>0.447</b>     | <b>0.944</b>     |
| BPAP+_DEP+          | 0.115             | 0.448            | 0.928            |

- 75% training and 25% testing data

| <b>Interactions</b> | <b>Prevalence</b> | <b>Precision</b> | <b>Stability</b> |
|---------------------|-------------------|------------------|------------------|
| DEP+_Mo+            | 0.076             | 0.558            | 0.936            |
| DEP+_MEPB+          | 0.053             | 0.573            | 0.696            |
| DEP+_U+             | 0.049             | 0.547            | 0.620            |
| <b>DEP+_TCP246+</b> | <b>0.083</b>      | <b>0.480</b>     | <b>0.792</b>     |
| <b>Cd+_DEP+</b>     | <b>0.100</b>      | <b>0.460</b>     | <b>0.848</b>     |
| BPAP+_DEP+          | 0.117             | 0.449            | 0.928            |

- 80% training and 20% testing data

| <b>Interactions</b> | <b>Prevalence</b> | <b>Precision</b> | <b>Stability</b> |
|---------------------|-------------------|------------------|------------------|
| DEP+_MEPB+          | 0.052             | 0.565            | 0.672            |
| <b>DEP+_TCP246+</b> | <b>0.098</b>      | <b>0.484</b>     | <b>0.908</b>     |
| <b>Cd+_DEP+</b>     | <b>0.117</b>      | <b>0.464</b>     | <b>0.956</b>     |
| Cd+_TCP246+         | 0.078             | 0.448            | 0.512            |

**Table S12: Results of SiRF from the three different data partitions without chemicals whose % of detection above LOD was less than 60%**

- 70% training and 30% testing data

| Interactions        | Prevalence   | Precision    | Stability    |
|---------------------|--------------|--------------|--------------|
| DEP+_U+             | 0.062        | 0.553        | 0.868        |
| DEP+_DETP+          | 0.055        | 0.506        | 0.660        |
| <b>DEP+_TCP246+</b> | <b>0.067</b> | <b>0.474</b> | <b>0.624</b> |
| DEP+_MCMHP+         | 0.074        | 0.447        | 0.708        |
| <b>Cd+_DEP+</b>     | <b>0.085</b> | <b>0.445</b> | <b>0.756</b> |
| BPAP+_DEP+          | 0.108        | 0.443        | 0.884        |

- 75% training and 25% testing data

| Interactions        | Prevalence   | Precision    | Stability    |
|---------------------|--------------|--------------|--------------|
| DEP+_Mo+            | 0.069        | 0.564        | 0.864        |
| DEP+_MEPB+          | 0.049        | 0.566        | 0.664        |
| DEP+_U+             | 0.042        | 0.542        | 0.528        |
| DEP+_TI+            | 0.051        | 0.527        | 0.576        |
| <b>DEP+_TCP246+</b> | <b>0.078</b> | <b>0.480</b> | <b>0.764</b> |
| DEP+_MCP+           | 0.052        | 0.461        | 0.504        |
| DEP+_MCMHP+         | 0.061        | 0.449        | 0.596        |
| <b>Cd+_DEP+</b>     | <b>0.078</b> | <b>0.456</b> | <b>0.708</b> |
| BPAP+_DEP+          | 0.094        | 0.444        | 0.792        |

- 80% training and 20% testing data

| Interactions        | Prevalence   | Precision    | Stability    |
|---------------------|--------------|--------------|--------------|
| <b>DEP+_TCP246+</b> | <b>0.086</b> | <b>0.485</b> | <b>0.808</b> |
| <b>Cd+_DEP+</b>     | <b>0.093</b> | <b>0.461</b> | <b>0.856</b> |
| DEP+_MCMHP+         | 0.071        | 0.444        | 0.628        |
| BPAP+_DEP+          | 0.090        | 0.450        | 0.724        |

**Table S13: Results of SiRF when the whole dataset was used to test the model trained on 75% data**

| <b>Interactions</b> | <b>Prevalence</b> | <b>Precision</b> | <b>Stability</b> |
|---------------------|-------------------|------------------|------------------|
| DEP+_Mo+            | 0.076             | 0.558            | 0.936            |
| DEP+_MEPB+          | 0.053             | 0.573            | 0.696            |
| DEP+_U+             | 0.049             | 0.547            | 0.620            |
| <b>DEP+_TCP246+</b> | <b>0.083</b>      | <b>0.480</b>     | <b>0.792</b>     |
| <b>Cd+_DEP+</b>     | <b>0.100</b>      | <b>0.460</b>     | <b>0.848</b>     |
| BPAP+_DEP+          | 0.117             | 0.449            | 0.928            |

## Tuning Parameters for WQS-SiRF

1. **WQS:**  $q = 10$ ,  $\text{signal} = \text{"t2"}$ ,  $b = 500$ ,  $\text{rs} = \text{T}$ ,  $n\_vars = 12$ ,  $\text{rh} = 100$ ,  $\text{validation} = 0.25$ ,  $\text{seed} = 123123123$ ,  $b1\_pos = \text{T}$ ,  $\text{family} = \text{"binomial"}$ ,  $\text{plan\_strategy} = \text{"multicore"}$
2. **SiRF:**  $\text{seed}$  was set at  $\text{set.seed}(123456)$  and  $n.\text{iter}=5$ ,  $n.\text{core}=1$ ,  $\text{select.iter} = \text{T}$ ,  $n.\text{bootstrap}=500$
3. **Selection of training and testing data**

- **70% training and 30% testing data:**

```
set.seed(123456)
train.id <- sample(seq(1,n), ceiling(n*70/100))
test.id <- setdiff(1:n, train.id)
```

- **75% training and 25% testing data:**

```
set.seed(123456)
train.id <- sample(seq(1,n), ceiling(n*75/100))
test.id <- setdiff(1:n, train.id)
```

- **80% training and 20% testing data:**

```
set.seed(123456)
train.id <- sample(seq(1,n), ceiling(n*80/100))
test.id <- setdiff(1:n, train.id)
```

## References

Bennett, D. H., Busgang, S. A., Kannan, K., Parsons, P. J., Takazawa, M., Palmer, C. D., Schmidt, R. J., Doucette, J. T., Schweitzer, J. B., Gennings, C., and Hertz-Picciotto, I. (2022), "Environmental exposures to pesticides, phthalates, phenols and trace elements are associated with neurodevelopment in the CHARGE study," *Environ Int*, 161, 107075. DOI: 10.1016/j.envint.2021.107075.
